# Supplementary material
Source: publisher site journal article supplement (https://www.dovepress.com/article/593288)
Supplement: Supplementary file 1 [file supplementary%20martials.docx]

Table.S1 The clinical trial results of acupuncture treatment for PSCI

| **References** | **Authors** | **Year** | **Country** | **Research design** | **Sample capacity** | **The time of stroke occurrence** | **PSCI diagnostic criteria** | **Intervention measures** | **Control group** | **Outcome indicators** | **Primary results** | **Adverse events** |
| --- | --- | --- | --- | --- | --- | --- | --- | --- | --- | --- | --- | --- |
| 48 | Jiang et al. | 2025 | China | A randomized, double-blind, sham-needle acupuncture controlled clinical trial was conducted to evaluate the effects of true acupuncture on cerebral perfusion and cognitive function in patients with vascular cognitive impairment (VCI). | A total of 70 patients with VCI were included. Among them, 35 patients were in the true acupuncture group and 35 patients were in the sham acupuncture group. The final completed cases: 35 patients in the true acupuncture group and 31 patients in the sham acupuncture group. | Unspecified | The Montreal Cognitive Assessment Scale (MoCA) was used to screen for cognitive function. A score lower than 26 indicated the presence of cognitive impairment. | True acupuncture group: Points such as Baihui, Sishencong, Touwei, Shule, Yin Tang, Yangguang, Fengfu, Fengchi, Quchi, Shoushi, Shangsi, etc. The depth of acupuncture was the conventional depth. The needles were retained for 30 minutes. The treatment was conducted twice a week for a total of 12 times, and it lasted for 6 weeks. Fake acupuncture group: The points were selected based on the true acupuncture, but shallow acupuncture was performed at a distance of 0.1 inch beside the non-meridian and non-acupoint areas of the selected points. | The sham acupuncture group (shallow needle insertion not through meridians or acupoints) | Main outcome: MoCA score (before acupuncture, 6 weeks after acupuncture) Secondary outcomes: Cerebral blood flow (CBF) measured by arterial spin labeling (ASL)-MRI, evaluated at before acupuncture, immediately after acupuncture, and 6 weeks after acupuncture | 1. Cognitive function: The MoCA score of the true acupuncture group significantly increased after 6 weeks of acupuncture compared to before acupuncture (P < 0.001), while there was no significant change in the sham acupuncture group; the difference between the two groups was significant (P < 0.001). 2. Cerebral perfusion: The CBF values in multiple brain regions (such as the left amygdala, left caudate nucleus, left precentral gyrus, etc.) of the true acupuncture group significantly increased over time (P < 0.001). Immediately after acupuncture and 6 weeks later, the CBF values in multiple brain regions of the true acupuncture group were significantly higher than those of the sham acupuncture group (P < 0.05). 3. Correlation analysis: The changes in CBF in multiple brain regions of the true acupuncture group were positively correlated with the improvement in MoCA score (P < 0.05). | Unspecified |
| 49 | Zhong et al. | 2025 | China | A randomized, single-blind, controlled trial was conducted to evaluate the efficacy of scalp acupuncture, intermittent theta burst stimulation (iTBS), and their combination in patients with post-stroke cognitive impairment (PSCIND). | A total of 60 patients were included. Eventually, 54 patients completed the study, with 18 patients in each group. | The first onset occurred and the duration of the illness ranged from 2 weeks to 6 months. | MoCA score < 26 MMSE score ≥ 21 Clinical Dementia Rating (CDR) score = 0.5 Cognitive impairment occurred after the stroke event | Sham acupuncture group: Select the acupuncture points MS1, MS2, MS3, MS5, MS10, MS11, etc., perform once a day, for 6 days a week, for a total of 4 weeks. iTBS group: Stimulate the left dorsolateral prefrontal cortex (l-DLPFC), with an intensity of 80% of the resting motor threshold, once a day, for 6 days a week, for a total of 4 weeks. Combined group: Receive both the above head acupuncture and iTBS treatments simultaneously, with the same frequency and duration as above. All patients received basic drug treatment, routine rehabilitation training, and cognitive function training. | The study compared the superiority of the combined therapy by using a single treatment method (transcranial acupuncture or iTBS) as the control group. | Main outcome: MoCA score Secondary outcome: MMSE score Mechanism indicators: Functional near-infrared spectroscopy (fNIRS) is used to detect changes in the oxygenated hemoglobin (HbO₂) concentration in the cerebral cortex. | 1. Cognitive function: After treatment, the MoCA and MMSE scores of all three groups showed significant improvement compared to those before treatment (P < 0.05).2. Comparison among groups: The MoCA and MMSE scores of the combined group were significantly higher than those of the acupuncture group and the iTBS group (P < 0.05), and there was no significant difference between the acupuncture group and the iTBS group. 3. Brain activation: The acupuncture group significantly activated the right superior temporal cortex and the right ventrolateral prefrontal cortex; the iTBS group significantly activated the left ventrolateral prefrontal cortex, the right ventrolateral prefrontal cortex, the left dorsolateral prefrontal cortex, the left superior frontal cortex, the right dorsolateral prefrontal cortex; the combined group activated a wider brain area, especially in the right superior temporal cortex, the right ventrolateral prefrontal cortex, the medial prefrontal cortex, the left ventrolateral prefrontal cortex, the right superior frontal cortex, and the left dorsolateral prefrontal cortex, where the activation was more significant (P < 0.05). 4. Correlation analysis: There was no significant correlation between the changes in HbO₂ and the improvement of MoCA and MMSE scores. | Unspecified |
| 51 | Fan et al. | 2023 | China | A randomized, controlled trial was conducted to evaluate the efficacy of acupuncture combined with oxiracetam compared to oxiracetam alone in patients with mild cognitive impairment after cerebral infarction. | A total of 90 cases were included and randomly divided into two groups, with 45 cases in each group.A total of 90 cases were included and randomly divided into two groups, with 45 cases in each group. Final outcome: 43 cases in the control group (2 cases dropped out), and 41 cases in the observation group (4 cases dropped out). | The disease course was 2 to 24 weeks (first cerebral infarction) | According to the criteria for mild cognitive impairment as stated in the "2018 Diagnosis and Treatment Guidelines for Dementia and Cognitive Impairment in China (Part 5): Diagnosis and Treatment of Mild Cognitive Impairment": having a clear history of cerebral infarction; a MoCA score of less than 26 points (the range of the included cases in the article is 19 to 26 points); and a Barthel Index score of more than 60 points. | Observation group: Olazitin capsules (800 mg per dose, twice daily, orally taken) + acupuncture treatment (acupoints selected: Fengfu, Fengchi, Baihui, emotional area, dizzy ear area, blood supply, yiming, Taixi, Zusanli, Sanyingjiao, Gongsui, etc., 6 times per week, with retained needle for 30 minutes), for a total of 4 weeks.  Control group: Only oral administration of Olazitin capsules (the same administration method as the observation group), for a total of 4 weeks. | Oxiracetam monotherapy | Serum indicators: GDNF, SIRT1, S100β, NSE Cerebral hemodynamic parameters: Vs, Vd, Vm, RI (transcranial Doppler ultrasound) Cognitive and functional scores: MoCA, MMSE, ADAS-Cog, Barthel index Efficacy assessment: According to the improvement rate of MoCA score, it is classified as marked effect, effective, or ineffective | 1. Serum indicators: After treatment, both groups showed an increase in GDNF and SIRT1, with the observation group having a higher level; S100β and NSE decreased, with the observation group having a lower level (P < 0.05). 2. Cerebral hemodynamic: After treatment, Vs, Vd, and Vm increased in both groups, while RI decreased. The observation group showed more significant improvement (P < 0.05). 3. Cognition and function: After treatment, MoCA, MMSE, and Barthel index increased in both groups, while ADAS-Cog decreased. The observation group showed more significant improvement (P < 0.05). In the MoCA sub-items, the observation group showed better improvements in visuospatial and executive functions, attention, delayed recall, and orientation. 4. Efficacy: The total effective rate of the observation group was 92.68%, which was higher than that of the control group (76.74%) (P < 0.05). | Unspecified |
| 64 | Zhang et al. | 2024 | China | A randomized, single-blind, controlled trial was conducted to evaluate the efficacy of acupuncture combined with transcranial direct current stimulation (tDCS) compared with tDCS alone or nimodipine in patients with post-stroke cognitive impairment (PSCI). | A total of 102 cases were included and randomly divided into 3 groups, with 34 cases in each group. Final completion: 32 cases in the acupuncture combined group (2 cases dropped out), 33 cases in the tDCS combined group (1 case dropped out), and 34 cases in the western medicine group (no cases dropped out). | The disease duration was 2 to 28 weeks (inclusion criteria) | It meets the diagnostic criteria for ischemic stroke as stipulated in the "2016 Edition of Chinese Guidelines for Diagnosis and Treatment of Cerebrovascular Diseases"; it also complies with the standards for vascular cognitive impairment as outlined in the "2019 Chinese Guidelines for Diagnosis and Treatment of Vascular Cognitive Impairment"; and the MoCA score ranges from 21 to 25 points (indicating mild cognitive impairment). | All patients received conventional treatment (including controlling blood pressure, blood sugar, blood lipids, and antiplatelet therapy).  Western medicine group: Nimodipine tablets (30 mg each time, 3 times a day), taken orally, for 4 weeks.  tDCS combined group: Nimodipine + tDCS (the anode is placed in the M1 area at C3/C4, and the cathode is placed in both eye sockets, 1.5 mA, 15 minutes each time, 1 time a day, 5 times a week), for 4 weeks.  Acupuncture combined group: Nimodipine + tDCS + Awakening and Opening Meridian Acupuncture Method (selected acupoints: Baihui, Shuiguang, Neiguan, Yin Tang, Sanyingjiao, 1 time a day), for 4 weeks. | The Western medicine group (treated with nimodipine alone) served as the baseline control group, while the tDCS combined group served as the control group for a single physical therapy. | Cognitive function: MoCA, LOTCA, RBMT scores Daily living ability: Barthel index Serum indicators: Hcy, NSE, BDNF Safety: Adverse event records | 1. Cognition and Function: After treatment, the MoCA, LOTCA, and Barthel Index of all three groups showed significant improvements compared to before treatment (P < 0.05). The acupuncture combined group showed the most significant improvement, outperforming the tDCS combined group and the western medicine group (P < 0.05). 2. Memory Function: The RBMT scores of the acupuncture combined group and the tDCS combined group both significantly increased, outperforming the western medicine group (P < 0.05). 3. Serum Indicators: After treatment, Hcy and NSE in all three groups decreased, while BDNF increased (P < 0.01). The acupuncture combined group showed the greatest improvement (P < 0.05). 4. Safety: In the acupuncture combined group, 2 cases of subcutaneous hematoma occurred (which resolved on their own), 1 case of mild dizziness occurred in the tDCS combined group (which resolved after rest), and 3 cases of nausea and vomiting occurred in the western medicine group (improved after symptomatic treatment). There was no statistically significant difference in the incidence of adverse reactions among the groups (P > 0.05). | Acupuncture combined group: 2 cases of subcutaneous hematoma; tDCS combined group: 1 case of mild dizziness; Western medicine group: 3 cases of nausea and vomiting. All were mild and no serious adverse events were reported. |
| 81 | Guo et al. | 2025 | China | A randomized, single-blind, controlled trial was conducted to evaluate the efficacy and impact on brain network topological properties of electroacupuncture combined with cognitive rehabilitation (CR) compared to cognitive rehabilitation alone in patients with PSCI. | A total of 50 cases were screened, and 34 cases were finally included in the analysis. | Within one year after the stroke (the inclusion criteria require a stable disease course). | According to the scientific statement of the American Heart Association/American Stroke Association (2023): If cognitive impairment occurs after a stroke event, and the patient reports it, the informant reports it, or the clinician judges that there is functional impairment in at least one cognitive domain, and there is neuro-psychological evidence confirming that cognitive function has decreased compared to before the stroke. | CR group: Personalized cognitive rehabilitation training (covering 7 cognitive domains including attention, calculation, writing, memory, thinking, orientation, and language), 1 time per day, 5 times per week, for a total of 12 weeks. EA + CR group: On the basis of the CR group, add electro-acupuncture treatment (acupoints: Baihui, Shenting, with sparse and dense wave at 10/50 Hz, current intensity 0.5 - 5.0 mA, 1 time per day, 30 minutes each time, 5 times per week), for a total of 12 weeks. | Simple Cognitive Rehabilitation Training (CR group) | Main outcome measures: MoCA, AVLT-H (Huashan version), Digit Span Test (DST), Aphasia Screening Scale; Secondary outcome measures: Global properties of DTI brain networks (Lp, Cp, Eglob, Eloc) and node properties (Ne, Ncp, Bc, Dc). | 1. Cognitive function: The EA + CR group showed significantly better improvements in the total MoCA score (P < 0.001), the total AVLT-H score (P = 0.004), as well as in the sub-items of naming, attention, delayed recall, and orientation compared to the CR group. 2. Global attributes of brain networks: The clustering coefficient (Cp) and local efficiency (Eloc) of the EA + CR group were significantly higher than those of the CR group (P < 0.05), and the improvement in Eloc was positively correlated with the improvement in MoCA score (r = 0.1716, P = 0.0255); there was no significant difference in global efficiency (Eglob) between the groups. 3. Node attributes of brain networks: The EA + CR group showed significantly increased Ne, Ncp, Bc, and Dc in multiple cognitive-related brain regions (frontal lobe, parietal lobe, temporal lobe, occipital lobe, cingulate gyrus, putamen nucleus, etc.). 4. Safety: 5 cases experienced soreness at the acupuncture site (relieved spontaneously 2 hours after treatment), 4 cases withdrew due to MRI noise, and 3 cases were unable to complete the examination due to head movement; there were no serious adverse events. | The acupuncture site experienced soreness and distension (a normal therapeutic reaction), and MRI-related discomfort (such as noise and restricted movement) occurred. There were no serious adverse events. |
| 83 | Wang et al. | 2023 | China | A randomized, single-blind, controlled neuroimaging trial was conducted to evaluate the effect of true acupuncture versus sham acupuncture on the dynamic functional network connectivity (dFNC) of the brain in patients with motor dysfunction after ischemic stroke. | A total of 53 cases were included, and they were randomly divided into groups (true acupuncture group: sham acupuncture group = 2:1). The final analysis involved 40 cases: 26 cases in the true acupuncture group and 14 cases in the sham acupuncture group. | Within 6 weeks after the onset of the disease | Ischemic stroke, single lesion in one hemisphere, pre-stroke right-handedness, clear consciousness, stable condition. | True acupuncture group: Twelve acupuncture points on the hands and feet (both sides: Hegu, Quchi, Neiguan, Zusanli, Yanglingquan, Sanyinjiao), with a depth of 20-30 mm. After feeling the qi, the needle is retained for 30 minutes. The treatment is conducted 5 times a week for a total of 2 weeks (10 times).  Fake acupuncture group: Acupuncture is performed at a shallow depth 20 mm away from the true acupoints, without feeling the qi. The rest of the procedures are the same as those of the true acupuncture group. Both groups receive conventional medication and rehabilitation treatment. | The sham acupuncture group (peripheral non-acupoint superficial needle insertion, avoiding feeling of Qi entry) | Clinical assessment: Fugl-Meyer Motor Function Score (FMA, for upper/lower extremities/total score), NIHSS; Neuroimaging: Dynamic functional network connectivity analysis, including: temporal attributes (state holding time, time proportion, state switching frequency), functional connection strength, and their correlations with clinical scores. | 1. Clinical improvement: After treatment, the total FMA score, lower limb FMA score, and NIHSS score in both groups significantly improved (P < 0.05); the upper limb FMA score in the true acupuncture group significantly improved (P < 0.05), while there was no significant improvement in the upper limb FMA score in the sham acupuncture group (P = 0.058). 2. Dynamic functional connectivity: After treatment, the duration of the sparse connection state (state 3) in the true acupuncture group was significantly shortened (P < 0.05), and this parameter was negatively correlated with the lower limb FMA score (r = 0.266, P = 0.049); in the true acupuncture group, the functional connectivity between the dorsal attention network and the default mode network was enhanced in state 1 (relative dissociated state); in state 3, the functional connectivity between the sensory-motor network and the frontal-parietal network was weakened; in the sham acupuncture group, the duration of stay was prolonged in state 2 (local tight connection state), and the internal connectivity of the frontal-parietal network was enhanced; Group comparison: In state 1 of the true acupuncture group, the functional connectivity between the dorsal attention network and the right frontal-parietal network was better than that of the sham acupuncture group (P < 0.05). 3. Correlation analysis: Multiple dynamic connection indicators were positively correlated with the FMA score. | Unspecified |
| 84 | Fei Wang et al. | 2021 | China | Randomized, controlled trial to evaluate the efficacy of acupuncture combined with cognitive training versus simple cognitive training in patients with cognitive dysfunction after ischemic stroke, as well as the changes in brain functional connectivity. | There were 40 cases in the observation group and 40 cases in the control group (with no reports of detachment). | Unspecified | According to the "Guidelines for the Prevention and Treatment of Cerebrovascular Diseases in China" and the relevant diagnostic criteria of "Internal Medicine of Traditional Chinese Medicine". | Observation group: Personalized cognitive training + acupuncture therapy (selecting Baihui and Shenting acupoints, once every other day, with the needle left in for 30 minutes, for a total of 8 weeks of treatment). Control group: Only received the personalized cognitive training program treatment, for a total of 8 weeks. | The group receiving simple cognitive training | Clinical scales: NIHSS, MMSE, MoCA, FMA, Modified Barthel Index (MBI); Neuroimaging: Resting-state functional magnetic resonance imaging (rs-fMRI), with bilateral hippocampus as the region of interest, to analyze changes in functional connectivity (only in the observation group). | 1. Efficacy: The total effective rate of the observation group was 95.0%, which was higher than that of the control group (77.5%) (P < 0.05). 2. Scale Scores: After treatment, both groups showed a decrease in NIHSS, and the scores of MMSE, MoCA, FMA, and MBI increased (P < 0.05). The improvement in the observation group was better than that in the control group (P < 0.05). 3. Functional Connectivity: After treatment, fMRI in the observation group showed that the functional connections between the left hippocampus and the right inferior frontal gyrus, right middle frontal gyrus, right hippocampus and left middle frontal gyrus, left inferior frontal gyrus, left occipital gyrus, left superior frontal gyrus, and left parietal lobe were enhanced (P < 0.05). | Unspecified |
| 88 | Zhong et al. | 2025 | China | A randomized, double-blind, sham-stimulation controlled trial was conducted to evaluate the effects of transcranial direct current stimulation (tDCS) on brain functional connectivity and network topological properties in patients with post-stroke cognitive impairment (PSCI). | A total of 65 cases were included and randomly divided into the tDCS group (33 cases) and the control group (32 cases). Final analysis: 27 cases in the tDCS group and 26 cases in the control group (excluded cases: 5 cases due to premature discharge, 7 cases with poor rs-fMRI quality). | First ischemic stroke, within 14 days of onset | It meets the diagnostic criteria for ischemic stroke. The existence of cognitive impairment was confirmed by a rehabilitation physician with over 8 years of experience, based on MMSE and MoCA assessments. There is no history of previous decline in cognitive function. | tDCS group: Conventional drug treatment + Anodal tDCS stimulation of the left dorsolateral prefrontal cortex (DLPFC), with an intensity of 1.5 mA, for 20 minutes each time, once a day, 5 times a week, for a total of 2 weeks. Control group: Conventional drug treatment + sham stimulation (the current only increases for the first 30 seconds and then turns off, the rest is the same as the tDCS group). Both groups received conventional drug treatment (antiplatelet, neuroprotective, improvement of brain metabolism, etc.). | Sham tDCS group | Cognitive function: MMSE, MoCA; Neuroimaging: Resting-state functional magnetic resonance imaging (rs-fMRI) | 1. Cognitive function: After treatment, both groups showed significant improvement in MMSE and MoCA (P < 0.001), and the improvement in the tDCS group was significantly greater than that in the control group (P < 0.05). 2. Functional connectivity: After treatment, the functional connectivity of 4 pairs of brain regions in the tDCS group significantly increased (P < 0.05, FDR correction): the right parietal lobe and the right angular gyrus; the left precuneus and the right precuneus; the left inferior parietal lobule and the left insula; the left superior frontal gyrus orbital part and the left superior frontal gyrus medial part. 3. Brain network topology: After treatment, the global efficiency (Eg) of the tDCS group significantly increased (P < 0.05, FDR correction), while the small-world property (σ) did not show significant changes; the two indicators in the control group did not show significant changes. 4. Correlation analysis: The improvement in Eg in the tDCS group was positively correlated with the improvement in MMSE score (r = 0.403, P = 0.037). | Unspecified |
| 90 | Luan et al. | 2025 | China | A randomized, controlled trial was conducted to evaluate the efficacy and quantitative changes in electroencephalogram (EEG) of the cognitive-stabilizing and brain-nourishing acupuncture combined with conventional treatment (donepezil hydrochloride + cognitive rehabilitation training) compared to conventional treatment alone in patients with post-stroke cognitive impairment (PSCI). | A total of 66 cases were included and randomly divided into the experimental group and the control group. Final analysis: 31 cases in the experimental group (2 cases dropped out), and 30 cases in the control group (3 cases dropped out). | Cognitive impairment occurs after a stroke event and persists for 3 to 6 months | According to the "Expert Consensus on Management of Cognitive Impairment after Stroke 2021": A clear diagnosis of stroke (transient ischemic attack, hemorrhagic or ischemic stroke); Cognitive impairment occurs after the stroke and persists for 3 to 6 months; There is at least one domain of cognitive impairment or a greater decline in cognition compared to the previous state as assessed by MoCA or MMSE; Other causes of cognitive impairment are excluded | Experimental group: Donepezil Hydrochloride Tablets (5 mg/day) + Cognitive Rehabilitation Training + Shenjing Zhizhi Yangnao Acupuncture (Shangxing, Wujue, Shenting, Meihong, Quadan, with a 20 mm vertical insertion, using repeated techniques for needle insertion, and leaving the needle in place for 40 minutes), once a day, 6 days a week, for a total of 8 weeks. Control group: Donepezil Hydrochloride Tablets (5 mg/day) + Cognitive Rehabilitation Training, for a total of 8 weeks. | Donepezil hydrochloride combined with cognitive rehabilitation training (without acupuncture intervention) | Cognitive function: MoCA; Daily living ability: ADL; Blood markers: Homocysteine (Hcy), Erythrocyte Sedimentation Rate (ESR), Quantitative Electroencephalogram (qEEG): Relative power of all brain alpha, beta, theta, and delta frequency bands (RP) and the ratio of slow wave to fast wave power (DTABR) | 1. Cognition and Function: After treatment, both groups showed an increase in MoCA scores and a decrease in ADL (P<0.05), and the improvement in the experimental group was better than that in the control group (P<0.05). 2. Blood Markers: After treatment, both groups showed a decrease in Hcy and ESR (P<0.05), and the decrease in the experimental group was more significant (P<0.05). 3. Electroencephalogram: After treatment, the whole-brain αRP and βRP in the experimental group significantly increased, while θRP, δRP, and DTABR significantly decreased (P<0.05); in the control group, only θRP was significantly decreased (P<0.05); after treatment, the comparison between the groups showed that the αRP and βRP in the experimental group were higher, and the θRP, δRP, and DTABR were lower (P<0.05). | Unspecified |

Table.S2 Preclinical research results of acupuncture treatment for PSCI

| **References** | **Model type** | **Study species** | **Intervention measures** | **Outcome indicators** | **Key mechanism markers** |
| --- | --- | --- | --- | --- | --- |
| 44 | Permanent middle cerebral artery occlusion (pMCAO) rat model (simulating acute ischemic stroke) | Adult male Sprague-Dawley (SD) rats (weighing 220–240 grams) | Electroacupuncture (EA): Acupoints: Baihui (GV20), Shuigou (GV26). Parameters: 2/15 Hz sparse-dense waves, intensity set to cause slight muscle twitching, duration 30 minutes. Intervention timing: Begins 60 minutes after pMCAO surgery. Control intervention: Sham electroacupuncture (SEA): Only inserts the needle at the acupoints but does not apply electricity. Chemical genetics inhibition: CNO activates hM4Di to inhibit NBM cholinergic neurons. Drug antagonism: Intraperitoneal injection of atropine (antagonist of muscarinic acetylcholine receptors). | Neurological function: mNSS score, Garcia JH score Brain injury: infarction volume (TTC staining) Degree of brain edema: neuronal survival (Nein staining) Cerebral blood flow: Laser Speckle Contrast Imaging (LSCI), three regions of interest (ROI) Side branch circulation of the arachnoid membrane: number, diameter, and vascular resistance of arachnoid membrane anastomotic vessels Vascular morphological parameters (length, span, tortuosity) Electrophysiology: discharge rate of NBM neurons Immunofluorescence: co-localization of c-Fos⁺/ChAT⁺ neurons | 1.Cholinergic Nervous System: Meynert Basal Nucleus (NBM) Cholinergic Neuron Activity (Firing Rate, co-expression of c-Fos/ChAT) 2.Muscarinic Acetylcholine Receptors (M receptors): Verified through Atropine antagonism experiments Lumbar Arterial Collateral Circulation: Diameter of anastomosed vessels (positively correlated with cerebral blood flow in ischemic areas), Vascular Resistance Index 3.Neuroprotection: Reduction in infarct volume, improvement in neuronal survival |
| 50 | The rat model of middle cerebral artery occlusion/reperfusion (MCAO/R) (simulating cognitive dysfunction after ischemic stroke) | Adult male Sprague-Dawley (SD) rats, body weight 260±20g | Electroacupuncture (EA): Points: Baihui (GV20), Shenteng (GV24). Parameters: Sparse-dense waves, 1-20Hz, 1-3mA, 30 minutes each time, once a day, for 14 consecutive days. Intervention timing: Start from the second day after MCAO/R surgery. | Neurological function: Zea-Longa neurological function impairment score (2 hours after surgery, 7 days, 14 days) Cognitive function: Morris water maze (MWM): Escape latency (9-13 days), number of crossing platform attempts (14th day) Cerebral infarction: TTC staining (infarction volume quantification) Molecular changes: TMT proteomics analysis (hippocampal tissue), Western blot verification of key proteins (Pak4, Akt3, Efnb2) | 1. Proteins related to the Pten/Akt signaling pathway: Pten: Downregulated in the EA group (negatively regulating the Akt pathway); Akt3: Downregulated in the MCAO/R group and upregulated in the EA group; Pak4: Downregulated in the MCAO/R group and upregulated in the EA group; Efnb2: Downregulated in the MCAO/R group and upregulated in the EA group; Nrp2: Upregulated in the EA group; Scrib: Upregulated in the MCAO/R group. 2. Other related proteins: Hdac2: Upregulated in both the MCAO/R group and the EA group; Msh2, Sema4d: Upregulated in the EA group. 3. Signaling pathways: MCAO/R inhibits the Pak4/Akt3 and Efnb2/Akt3 pathways; EA activates the Pten/Akt pathway by downregulating Pten and upregulating Akt3/Pak4/Efnb2, exerting neuroprotective effects. |
| 60 | The rat model of middle cerebral artery occlusion/reperfusion (MCAO/R) (simulating cognitive dysfunction after ischemic stroke) | Adult male Sprague-Dawley (SD) rats, weighing 230–250 grams | Specific Pattern Electroacupuncture Stimulation (SMES): Points: Gallbladder Point (GV26), Hundred Converging Points (GV20). Parameters: Sparse-dense waves, 2/100Hz, 3mA, 6 seconds on / 6 seconds off cycle, for 40 minutes. Intervention timing: Begins on the 28th day after MCAO/R surgery, once daily, for 10 consecutive days. Drug intervention: Mouse nerve growth factor (mNGF): Intravenous injection through the tail vein, administered 5 minutes before SMES. Inhibitor: Pyrrolidine dithiocarbamate (PDTC, NF-κB inhibitor), intraperitoneal injection 6 hours before SMES. | Behavioral science: Morris Water Maze (MWM), Novel Object Recognition Experiment (NOR) Molecular and histological: NGF distribution in the brain: ELISA detects NGF content in different brain regions (M1, hippocampus, brainstem, etc.); Apoptosis: TUNEL staining (hippocampus CA1, CA2, CA3, DG); Mitochondrial ultrastructure: Transmission Electron Microscopy (TEM) observes mitochondrial morphology in the CA1 area of the hippocampus; Cholinergic neurons: Immunohistochemistry detects the number of ChAT-positive cells; Blood-brain barrier-related proteins: Western blot detects occludin, ZO-1; Signal pathway proteins: Immunohistochemistry and Western blot detect p-p65 (NF-κB), VEGFA. | 1. Signal Pathway: p65-VEGFA-TJs p-p65 (NF-κB phosphorylation): Expression increases after SMES; VEGFA: Expression increases after SMES; Tight junction proteins (occludin, ZO-1): Expression decreases after SMES, suggesting an open blood-brain barrier. NGF Delivery and Cognitive Improvement: NGF: SMES promotes the entry of exogenous NGF into cognitive-related brain regions such as the hippocampus; ChAT (choline acetyltransferase): The number of ChAT-positive cells in the CA1, CA3, and DG regions of the hippocampus increases in the SMES + NGF group; TUNEL-positive cells: Apoptosis decreases in the hippocampal regions of the SMES + NGF group; Mitochondrial Structure: The mitochondrial morphology in the SMES + NGF group tends to be normal (complete structure, clear cristae). 2. Key Regulatory Relationship: SMES opens the blood-brain barrier through the p65-VEGFA-TJs pathway and promotes NGF entry into the brain; After NGF enters the brain, it protects basal forebrain cholinergic neurons and improves cognitive function. |
| 61 | The rat model of middle cerebral artery occlusion/reperfusion (MCAO/R) (simulating the recovery period of ischemic stroke) | Adult male Sprague-Dawley (SD) rats, weighing 250–270 grams (3 months old) | Electroacupuncture (EA): Points: Baihui (GV20), Shuigou (GV26). Parameters: 2/100Hz, 2mA, 6 seconds on / 6 seconds off cycle, for 40 minutes. Intervention timing: Start 3 weeks after MCAO/R (after BBB repair), once daily, for 6 consecutive days. Drug intervention: Nerve growth factor (NGF): Intravenous injection (10μg/kg), once daily, for 6 days. FITC-labeled NGF (FITC-NGF): Used for tracing and observation. | Determination of BBB repair time point (Experiment 1): Brain infarction volume: TTC staining (24 h after surgery, 72 h, 2 weeks, 3 weeks) BBB ultrastructure: Transmission electron microscopy (TEM) observation of vascular endothelium, basement membrane, mitochondria, etc. BBB permeability: Evans blue (EB) fluorescence intensity (laser confocal + small animal in vivo imaging) Electroacupuncture promotes NGF entry into the brain (Experiment 2): NGF intracerebral content: ELISA detection (right cerebral cortex) FITC-NGF distribution: Laser confocal microscopy observation of distribution around blood vessels, digital pathological slice scanning analysis of fluorescence intensity (FIOD), neuronal uptake rate (co-localized with NeuN) Cognitive function and cell apoptosis (Experiment 3): Learning and memory: Morris water maze (MWM), neuronal apoptosis: TUNEL staining (hippocampus area) | 1. BBB repair-related: BBB integrity: TEM of vascular endothelium, basement membrane, and mitochondrial structure; permeability markers: EB exudation, FITC-glucan (20 kDa) exudation (mentioned in the previous data in the text) 2. NGF delivery and neuronal uptake: NGF: Concentration of exogenous NGF in brain tissue; FITC-NGF: Distribution around blood vessels + uptake by neurons (co-localized with NeuN) 3. Cognitive improvement and neuroprotection: Learning and memory behavior: MWM escape latency, number of platform crossings; Neuronal survival: Decrease in TUNEL-positive cells (in the hippocampus). |
| 62 | The rat model of middle cerebral artery occlusion/reperfusion (MCAO/R) (simulating memory impairment after ischemic stroke) | Adult male Sprague-Dawley (SD) rats, weighing 300 ± 20 grams (approximately 10 weeks old) | Electroacupuncture (EA): Points: Baihui (DU20), Shenting (DU24). Parameters: 2/20Hz sparse-dense wave, 0.2mA, 6V, 30 minutes each time, once a day, for 7 consecutive days. Intervention timing: Begins after MCAO/R surgery. Drug intervention: BzATP (P2X7R agonist): Intraventricular injection (75μM, 7μL), administered 1 hour before MCAO/R surgery. | Behavioral science: Barnes maze: escape latency (learning stage), target quadrant stay time, target hole access frequency, first entry to target hole latency, movement speed;  Imaging and neurofunction: T2-weighted magnetic resonance imaging (T2WI): quantitative cerebral infarction volume (24 hours before intervention and 7 days after intervention); Zea-Longa neurological deficit score (postoperative 1, 3, and 7 days); survival rate (1–7 days after surgery).  Molecular and histological:  Inflammatory factors: ELISA and qRT-PCR detection of IL-1β, IL-6, IL-4, IL-10 (hippocampus)  Oxidative stress: ROS, MDA, SOD levels (hippocampus)  Immunofluorescence: co-localization of Iba1⁺/P2X7R⁺ (marker of M1 microglia) Iba1⁺/Arg-1⁺ (marker of M2 microglia)  Western blot: protein expression of P2X7R, Nrf2, NLRP3, iNOS, Arg-1 (hippocampus) | 1. P2X7R signaling axis: P2X7R: Expression increases after MCAO/R, decreases after EA; BzATP reverses the effect of EA; Nrf2: Expression increases after EA, reversed by BzATP; NLRP3: Expression decreases after EA, reversed by BzATP; 2. Microglial polarization: M1 marker: iNOS, IL-1β, IL-6 (decreased after EA, reversed by BzATP); M2 marker: Arg-1, IL-4, IL-10 (increased after EA, reversed by BzATP); Immunofluorescence co-localization: Decreased Iba1⁺/iNOS⁺ cells, increased Iba1⁺/Arg-1⁺ cells (after EA); 3. Oxidative stress: ROS, MDA: Decreased after EA, reversed by BzATP; SOD: Increased after EA, reversed by BzATP; 4. Key pathway relationship: EA inhibits P2X7R to upregulate Nrf2 and downregulate NLRP3, promoting M2 polarization of microglia, alleviating neuroinflammation and oxidative stress, and improving memory impairment. |
| 63 | The rat model of middle cerebral artery occlusion/reperfusion (MCAO/R) (simulating cognitive impairment after ischemic stroke) | Adult male Sprague-Dawley (SD) rats, weighing 180–220g (8–9 weeks old), maintained at 260±20g during the experiment. | Electroacupuncture (EA): Points: Shenting (GV24), Baihui (GV20). Parameters: 2/100Hz sparse-dense wave, 1mA, 30 minutes each time, once a day, for 14 consecutive days. Intervention timing: Begins 24 hours after MCAO/R surgery. Drug intervention: Astegolimab (Anti-ST2, ST2 inhibitor): Intraventricular injection (5μg/μL, 5μL), administered before EA intervention. | Neurological Function and Brain Injury:  Zea-Longa Neurological Function Deficiency Score (7 days and 14 days after surgery);  Cerebral Infarction Volume: TTC staining (14 days);  Behavioral Studies:  Open Field Experiment (OFT): Total movement distance, central zone stay time;  New Object Recognition Experiment (NOR): Latency, exploration times, exploration time, cognitive index, discrimination index;  Histology and Molecular Biology:  White Matter Structure: HE staining (neuronal morphology of the striatum), MBP (myelin basic protein): Western blot, immunofluorescence, oligodendrocyte precursor cells (NG2⁺/BrdU⁺) and mature oligodendrocytes (APC⁺/BrdU⁺) immunofluorescence;  Microglial Polarization: M1 type: Iba-1⁺/CD16⁺ immunofluorescence, M2 type: Iba-1⁺/CD206⁺ immunofluorescence;  Inflammatory Factors: ELISA detection of serum IL-33, IL-10, IL-4, TNF-α, IL-1β, IL-6;  Signal Pathway Proteins: Western blot detection of ST2 expression. | 1. IL-33/ST2 signaling axis: IL-33: Its level in serum increases after EA, and the ST2 inhibitor blocks its effect; ST2: The specific receptor of IL-33, playing a key role in the neuroprotective effect mediated by EA. 2. Microglial cell polarization: M1 marker: CD16, iNOS (not measured in the text but referenced), TNF-α, IL-1β, IL-6 (decreased after EA); M2 marker: CD206, Arg-1 (not measured in the text), IL-10, IL-4 (increased after EA); EA promotes microglial cell polarization to the M2 phenotype through the IL-33/ST2 axis. 3. White matter repair: MBP: Its expression increases after EA, and the ST2 inhibitor blocks it; NG2⁺/BrdU⁺ (new oligodendrocyte precursor cells): The number increases after EA; APC⁺/BrdU⁺ (new mature oligodendrocytes): The number increases after EA. EA promotes oligodendrocyte generation and repairs white matter damage through the IL-33/ST2 axis. 4. Inflammatory factor balance: Anti-inflammatory factors: IL-10, IL-4 (increased after EA); Pro-inflammatory factors: TNF-α, IL-1β, IL-6 (decreased after EA). 5. Key pathway relationship: EA upregulates IL-33, activates the ST2 receptor, promotes microglial cell M2 polarization, alleviates neural inflammation, promotes oligodendrocyte generation and white matter repair, and improves cognitive function. |
| 65 | Rat model of middle cerebral artery occlusion (MCAO) (simulating cognitive impairment after ischemic stroke) | Adult male Sprague-Dawley (SD) rats, aged 10-12 weeks, with a body weight of 250-280 grams | Electroacupuncture (EA): Points: Fengchi (GB20), Fengfu (GV16), Dazhui (GV14). Parameters: 1-20Hz sparse-dense waves, 2mA, 6V, 30 minutes each time, once a day, for 8 consecutive days. Intervention timing: Begins 2 hours after MCAO surgery. Drug intervention: Rapamycin (RAPA): an autophagy activator, continuously intraperitoneal injection 3 days before surgery (3mg/kg). miR-135a-5p antagonist: Intracerebral injection 4 hours after surgery (2.5nmol). | Neurological function and brain injury: Zea-Longa neurological function impairment score (2 h post-operation, 1 day, 3 days, 8 days); Brain infarction volume: TTC staining (8 days); Hippocampal histopathology: HE staining; Behavior: Morris water maze (MWM): Escape latency (1-5 days), number of platform crossings (8th day); Inflammation and oxidative stress: Serum inflammatory factors: ELISA detection of TNF-α, TGF-β, IL-6, IL-10; Oxidative stress markers: SOD activity, MDA level. Autophagy and signaling pathways: Transmission electron microscopy (TEM): Observation of autophagosomes (cerebral cortex); Western blot: LC3-II/I, Beclin1, p62, mTOR, NLRP3, caspase-3, caspase-1, Bax, Bcl-2, IL-1β; miRNA expression: RT-qPCR: Expression level of miR-135a-5p; Molecular mechanism verification: Dual luciferase reporter gene experiment: Verification of direct binding of miR-135a-5p to mTOR 3'UTR. | 1. miR-135a-5p: Expression is downregulated after MCAO and upregulated after EA; Directly targets the 3'UTR of mTOR; miR-135a-5p antagonist reverses the protective effect of EA. 2. Autophagy-related markers: LC3-II/I: Ratio decreases after EA (autophagy flux reduces); Beclin1: Expression decreases after EA; p62/SQSTM1: Expression increases after EA (accumulation of autophagy substrates reduces); Autophagosomes: Number decreases after EA (observed by TEM). 3. mTOR/NLRP3 signaling axis: mTOR: Expression increases after EA (negative regulation of autophagy); NLRP3: Expression decreases after EA (inhibition of the inflammasome); IL-1β, caspase-1: Expression decreases after EA. 4. Inflammation and oxidative stress: Pro-inflammatory factors: TNF-α, IL-6 (decreased after EA); Anti-inflammatory factors: TGF-β, IL-10 (increased after EA); Oxidative stress: MDA decreases, SOD increases (after EA). 5. Apoptosis-related markers: Bax: Expression decreases after EA (promotes apoptosis); Bcl-2: Expression increases after EA (anti-apoptotic); caspase-3: Expression decreases after EA. 6. Key pathway relationship: EA upregulates miR-135a-5p, inhibits mTOR, inhibits autophagy, inhibits NLRP3 inflammasome, alleviates neuroinflammation and oxidative stress, and improves cognitive function. |
| 66 | Rat model of middle cerebral artery occlusion (MCAO) (simulating vascular cognitive impairment, VCI) | Male Sprague-Dawley (SD) rats, body weight 250±20g | Electroacupuncture (EA): Points: Shenting (GV24), Baihui (GV20). Parameters: 2/10Hz sparse-dense wave, 1-2mA, 20 minutes each time, once a day, for 7 consecutive days. Intervention timing: Start from the second day after MCAO surgery. | Neurological Function and Behavior: Zea-Longa Neurological Function Deficiency Score (24 hours post-operation, 7 days); Morris Water Maze (MWM); Proteomics: iTRAQ Labeling Quantitative Proteomics (Hippocampal Tissue): Number of Differentially Expressed Proteins (DEPs) identified: 2872 proteins in total; Model group vs Sham operation group: 92 upregulated, 103 downregulated; Electroacupuncture group vs Model group: 142 upregulated, 126 downregulated; Common DEPs in both groups: 41. GO Function Enrichment Analysis (Biological Process, Molecular Function, Cellular Component); KEGG Pathway Enrichment Analysis (Oxidative Phosphorylation, Metabolic Pathway, Glutamatergic Synapse, AMPK Signaling, etc.) Western blot verification: Verify 4 DEPs: Hspb1, Vim, Pkm, Gnb1. | 1. Hspb1 (Heat Shock Protein β1): In the model group, its expression was downregulated, while in the electroacupuncture group, it was significantly upregulated (iTRAQ showed a 6.897-fold increase, and WB confirmed the trend was consistent); The protein with the most significant change might be the key molecule for electroacupuncture to improve cognition; Known functions: Anti-apoptosis, anti-oxidative stress, maintaining cytoskeleton stability, and exerting neuroprotective effects in cerebral ischemia. 2. Other validated DEPs: Vim (Vimentin): In the model group, it was downregulated, while in the electroacupuncture group, it was upregulated; Pkm (Pyruvate Kinase M): In the model group, it was downregulated, while in the electroacupuncture group, it was upregulated (involved in sugar metabolism); Gnb1 (G Protein β1 Subunit): In the model group, it was upregulated, while in the electroacupuncture group, it was downregulated (involved in signal transduction). 3. Key mechanisms suggested by enriched pathways: Oxidative phosphorylation: Indicates regulation of energy metabolism; Carbon metabolism, pyruvate metabolism, fatty acid degradation: Indicates reorganization of glycolipid metabolism; Glutamatergic synapse: Indicates regulation of excitatory neurotransmitters; Glutamatergic synapse: Indicates regulation of excitatory neurotransmitters; Ribosome pathway: Indicates regulation of protein synthesis. |
| 67 | The rat model of vascular dementia (VaD) established by the four-vessel occlusion (4-VO) method (simulating global cerebral ischemia-reperfusion injury) | Male Sprague-Dawley (SD) rats, body weight 180–200g | Electroacupuncture (EA): Points: Baihui (DV20), Shanzhong (RN17), Diyu (BL17), Qihai (RN6), Sanyingtiao (SP6), a total of 5 points. Parameters: 2/15Hz sparse-dense wave, 1mA, 30 minutes each time, once a day, for 3 consecutive weeks. Intervention timing: Start 7 days after 4-VO surgery. Control intervention: Non-needling non-acupoint electroacupuncture (non-EA): Perform electroacupuncture stimulation at non-acupoint locations beside the 5 points. Sham+EA: Only fixed and grasping stimulation, without electroacupuncture. | Immune function:  T lymphocyte subsets: Flow cytometry for detection of CD3⁺, CD3⁺CD4⁺, CD3⁺CD8⁺, CD4⁺/CD8⁺;  Lymphocyte transformation rate: MTT method for detection of spleen lymphocyte transformation index (SI);  Inflammatory factors:  Serum IL-6, TNF-α: ELISA;  Hippocampal IL-6, TNF-α mRNA: Real-time quantitative PCR;  Histopathology:  Hippocampal neuron ultrastructure: Transmission electron microscopy (TEM);  Signal pathways:  TLR4, MyD88 protein and mRNA: Western blot, real-time quantitative PCR;  Cognitive function: Morris water maze (MWM): Escape latency (days 1-6), number of platform crossings (day 7) | 1. TLR4/MyD88 signaling pathway: TLR4 (Toll-like receptor 4): expression increases after 4-VO treatment, decreases after EA treatment; MyD88 (myeloid differentiation factor 88): expression increases after 4-VO treatment, decreases after EA treatment; downstream of the pathway: IL-6 and TNF-α expression is downregulated. 2. Immune regulatory markers: T lymphocyte subsets: CD3⁺, CD3⁺CD4⁺, CD4⁺/CD8⁺ decrease after 4-VO treatment, increase after EA treatment; CD3⁺CD8⁺ increases after 4-VO treatment, decreases after EA treatment; Lymphocyte transformation rate: decreases after 4-VO treatment, increases after EA treatment. 3. Inflammatory factors: IL-6: serum and hippocampus increase after 4-VO treatment, decrease after EA treatment; TNF-α: serum and hippocampus increase after 4-VO treatment, decrease after EA treatment. 4. Neuronal structure: Hippocampal ultrastructure: EA improves neuronal edema, mitochondrial swelling, nuclear membrane invagination, and disruption of organelle structure. 5. Drug validation: TLR4 agonist LPS: reverses the protective effect of EA; TLR4 antagonist TAK-242: mimics the protective effect of EA. 6. Key pathway relationship: EA inhibits the TLR4/MyD88 signaling pathway, reduces IL-6 and TNF-α release, alleviates immune inflammatory response, protects hippocampal neurons, and improves cognitive function. |
| 68 | The vascular dementia (VaD) rat model established by bilateral common carotid artery ligation (2-VO) (simulating chronic cerebral hypoperfusion) | Adult male Sprague-Dawley (SD) rats, aged 8-10 weeks, with a body weight of 250 ± 20 grams | Electroacupuncture (EA): Points: Baihui (DU20), Zusanli (ST36). Parameters: 2/10Hz sparse-dense wave, 1mA, 30 minutes each time, once a day, for 4 consecutive weeks. Intervention timing: Start 7 days after 2-VO surgery. | Behavioral science: Morris Water Maze (MWM); Histopathology: Nissl staining; Molecular detection: Immunohistochemistry: Expression of Sirt1, STAT3, and IL-17A in the CA1 region of the hippocampus and the amygdala (number of positive cells, average gray value); Western blot: Protein expression of Sirt1, STAT3, and IL-17A (in the hippocampus and amygdala). | 1. Sirt1/STAT3 signaling pathway: Sirt1 (deacetylase): Expression is decreased in the VaD group and increased in the electroacupuncture group; STAT3 (signal transducer and activator of transcription 3): Expression is increased in the VaD group and decreased in the electroacupuncture group; Sirt1 inhibits STAT3 activity by deacetylation, thereby alleviating inflammation; 2. Inflammatory factors: IL-17A: Expression is increased in the VaD group (in the hippocampal CA1 region and amygdala), and decreased in the electroacupuncture group; 3. Neuronal injury markers: Nissl bodies: Decreased in the VaD group, restored in the electroacupuncture group; Neuronal morphology: Cell atrophy and disordered arrangement in the VaD group, improved in the electroacupuncture group; 4. Key pathway relationship: Electroacupuncture upregulates Sirt1, inhibits STAT3 activation, reduces IL-17A release, alleviates neural inflammation, protects hippocampal and amygdala neurons, and improves learning and memory functions. |
| 75 | The vascular cognitive impairment (VCI) rat model established by bilateral common carotid artery permanent ligation (2-VO) (simulating chronic cerebral hypoperfusion) | Male Sprague-Dawley (SD) rats, 8 weeks old, with a body weight of 250–300 grams | Electroacupuncture (EA): Points: Baihui (GV20), Shentang (GV24). Parameters: 2/20Hz sparse-dense wave, 1-3mA, 6V, 30 minutes each time, once a day, 5 days a week, for 4 consecutive weeks. Intervention timing: Begins after 2-VO surgery. Control intervention: Non-acupoint electroacupuncture (Non-acu): Electroacupuncture stimulation is applied at non-acupoint locations on both sides of the lower back. Sham surgery group: Only the bilateral common carotid arteries are separated without ligation. | Behavioral Science: New Object Recognition Experiment (NOR): Discrimination Index (1 h and 24 h); Morris Water Maze (MWM). Imaging: 3D-TOF Magnetic Resonance Angiography (MRA): Verification of successful bilateral common carotid artery ligation; Electrophysiology (Hippocampal CA3-CA1 Pathway): Input-Output Curve (I/O): fEPSP amplitudes under different stimulation intensities (10–90 μA); Biphasic Facilitation Ratio (PPR): Different stimulation intervals (10, 20, 50, 100, 200, 500 ms); Long-Term Potentiation (LTP): Change in fEPSP slope after high-frequency stimulation (100 Hz, 2 times, 30 s interval); Spontaneous Excitatory Postsynaptic Current (sEPSC): Amplitude, Frequency, Rise Time, Decay Time; Molecular Detection: Western blot (hippocampus): NMDAR2B (total protein and phosphorylated), GluR1 (AMPA subunit, total protein and phosphorylated), CaMKII (total protein and phosphorylated) | 1. Signal molecules related to synaptic plasticity: NMDAR2B: The phosphorylation level decreased in the VCI group and increased in the electroacupuncture group; GluR1 (AMPA subunit): The phosphorylation level decreased in the VCI group and increased in the electroacupuncture group; CaMKII: The phosphorylation level decreased in the VCI group and increased in the electroacupuncture group; 2. Synaptic function reflected by electrophysiological indicators: I/O curve: The curve decreased in the VCI group and increased in the electroacupuncture group, improving the basal synaptic transmission efficiency; PPR: There was no difference among all groups, the presynaptic function was not affected, the electroacupuncture effect mainly acted on the postsynaptic; LTP: The VCI group was damaged, the electroacupuncture group recovered, synaptic plasticity was enhanced; sEPSC: The amplitude, frequency, rise time, and decay time of sEPSC decreased in the VCI group; Pathway relationship: Electroacupuncture enhanced the phosphorylation of NMDAR2B, GluR1, and CaMKII at the postsynaptic side, improving the synaptic transmission efficiency and LTP in the hippocampus CA3-CA1 region, and improving learning and memory. |
| 89 | The rat model of middle cerebral artery occlusion/reperfusion (MCAO/R) (simulating ischemic stroke) | Adult male Sprague-Dawley (SD) rats, weighing 250–280 grams | Electroacupuncture (EA): Points: Quchi (LI11), Zusanli (ST36) (for the right limb). Parameters: 2/15Hz sparse-dense wave, 0.1mA, 30 minutes each time, once a day, for 7 consecutive days. Intervention timing: Begins after MCAO/R surgery. | Neurological function: Zea-Longa neurological function impairment score (7 days after surgery);  Imaging and brain network analysis:  Resting-state functional magnetic resonance imaging (rs-fMRI): 11.7 T small animal imaging system;  Graph theory analysis (GRETNA toolbox): Global topological properties: shortest path length (Lp), global efficiency (E_glob), local efficiency (E_loc), small-world index (Sigma); Node topological properties: betweenness centrality (BC), degree centrality (DC). | 1. Changes in node topological properties (brain network hub nodes): Right ventral hippocampus (R_Hippocampus_Ventral): Sham > MCAO/R (BC decreased); MCAO/R < MCAO/R+EA (BC increased, EA restored); Right substantia nigra (R_Substantia_Nigra): Sham < MCAO/R (BC increased); MCAO/R > MCAO/R+EA (BC decreased, EA reversed); Left accumbens shell (L_AcbSh): Sham < MCAO/R (DC increased); MCAO/R > MCAO/R+EA (DC decreased, EA reversed); 2. Global topological properties: Shortest path length (Lp), global efficiency (E_glob), local efficiency (E_loc), small-world index (Sigma): There were no significant differences among all groups; All groups had Sigma > 1, maintaining the small-world network characteristics; 3. Functional significance of key brain regions: Hippocampus (Hippocampus): Core brain region for cognitive function, decreased BC is related to cognitive impairment, EA can restore; Substantia Nigra (Substantia Nigra): Center for movement control, increased BC may be related to secondary degeneration, EA can reduce; Accumbens shell (AcbSh): Regulation of reward and goal-directed behavior, increased DC may reflect excessive activation, EA can inhibit; 4. Mechanism of electroacupuncture: EA regulates the topological centrality of key nodes (hippocampus, substantia nigra, accumbens shell), reshapes the functional connections of the brain network after ischemia, and promotes the recovery of cognitive and motor functions. |
| 96 | The rat model of middle cerebral artery occlusion/reperfusion (MCAO/R) (simulating cognitive impairment after ischemic stroke) | Male Sprague-Dawley (SD) rats, aged 6-8 weeks, with a body weight of 210 ± 20g (reaching 260 ± 20g during the experiment) | Electroacupuncture (EA): Acupoints: Baihui (GV20), Shenting (GV24). Parameters: 1–20Hz sparse-dense waves, 6V, once 30 minutes, once a day, for 14 consecutive days. Intervention timing: Begins after MCAO/R surgery. Control intervention: Sham EA group: Needle insertion near the trunk end of the tail, not through any meridians or acupoints, with the same parameters as the electroacupuncture group. | Neurological function and brain injury: Zea-Longa neurological function impairment score (1 day and 14 days after surgery); Cerebral infarction volume: TTC staining (14 days); Neuronal pathology in the CA1 region of the hippocampus: HE staining. Behavioral studies: New Object Recognition Test (NOR): Discrimination Index (DI). Mitochondrial structure and function: Transmission Electron Microscopy (TEM): Mitochondrial morphology, quantity, and length in the CA1 region of the hippocampus; Oxidative stress: SOD activity, MDA content; Energy metabolism: ATP content, enzyme activities of mitochondrial respiratory chain complexes I-IV. Molecular detection: Western blot (hippocampus): SIRT1, PGC-1α, OPA1 (fusion protein), DRP1 (dividing protein); Q-PCR (hippocampus): mRNA expression of SIRT1, PGC-1α, OPA1, DRP1 | 1. SIRT1/PGC-1 α signaling pathway: SIRT1 (deacetylase): the expression of SIRT1 decreased in MCAO/R group, but increased in EA group; PGC-1α (peroxisome proliferator activated receptor γ coactivator-1α): the expression of PGC-1 α decreased in MCAO/R group, but increased in EA group; Electroacupuncture regulates mitochondrial dynamics by activating SIRT1/PGC-1 α pathway. 2. mitochondrial dynamics related proteins: OPA1 (optic atrophy protein 1, fusion protein): the expression of OPA1 in MCAO/R group decreased, while that in EA group increased; Drp1 (motor protein related protein 1, division protein): the expression of drp1 in MCAO/R group was increased, while that in EA group was decreased; Electroacupuncture promotes mitochondrial fusion, inhibits mitochondrial division, and restores mitochondrial dynamic balance. 3. mitochondrial structure and function: Mitochondrial morphology: in MCAO/R group, mitochondria were spherical, cristae blurred, and bilayer membrane was broken; The electroacupuncture group recovered to a long rod shape with relatively complete structure; The number and length of mitochondria in MCAO/R group increased and the length shortened; The electroacupuncture group was reversed; Oxidative stress: SOD: decreased in MCAO/R group, increased in EA group MDA: MCAO/R group increased, while EA group decreased; Energy metabolism: ATP content: decreased in MCAO/R group and increased in EA group; The activity of mitochondrial respiratory chain complex I – IV enzyme was decreased in MCAO/R group and increased in EA group. |
| 98 | The rat model of middle cerebral artery occlusion/reperfusion (MCAO/R) (simulating the acute phase of ischemic stroke) | Adult male Sprague-Dawley (SD) rats, body weight 230–270g | Acupuncture: Points: Fengfu (GV16), Baihui (GV20), bilateral Fengchi (GB20), Zusanli (ST36), Quchi (LI11). Parameters: 20 minutes each time, once a day, for 7 consecutive days. Intervention timing: Begins the day after MCAO/R surgery. | Neurological function: Zea-Longa score, balance beam score; Histopathology: HE staining (brain tissue necrosis, edema, angiogenesis); Energy metabolism: ATP content, mitochondrial respiratory chain complex I activity, NADH oxidase (NOX) level Molecular detection: Immunohistochemistry and Western blot: AMPK, p-AMPK, PGC-1α, NRF2, TFAM, UCP2; q-PCR: AMPK, PGC-1α, NRF2, TFAM, UCP2 mRNA, Mechanism verification: Intraventricular injection of AMPK antagonist (Compound C) and agonist (AICAR). | 1. AMPK/PGC-1α signaling axis: AMPK, p-AMPK: Expression increased after acupuncture PGC-1α, NRF2, TFAM, UCP2: Expression increased after acupuncture 2. Mitochondrial function related: ATP, mitochondrial complex I: Increased after acupuncture NOX: Decreased after acupuncture (indicating reduced oxidative stress) 3. AMPK as a key target: AMPK antagonists reverse the acupuncture effect, while agonists enhance the acupuncture effect |
| 99 | A mouse model of post-stroke depression (PSD) was established by combining bilateral common carotid artery occlusion (BCCAO) with chronic unpredictable stress (CUMS). | Male C57Bl/6j mice, aged 8-10 weeks, weighing 25-30 grams. | Electroacupuncture (EA): Acupoint: Baihui (GV20). Parameters: 2/15Hz, 1mA, 30 minutes each time, once a day, for 14 consecutive days. Intervention timing: Begins on the 7th day after BCCAO surgery, synchronized with CUMS. | Depressive-like behaviors: tail suspension test (TST), forced swimming test (FST), novel inhibitory feeding test (NSFT), sucrose preference test (SPT), open field test (OFT), elevated plus maze (EPM); Cognitive functions: Y-maze, new object recognition test (NORT); Molecular detection: Western blot for hippocampal CB1R, NRF1, TFAM, Cyto C, AIF, COX IV; Mechanism verification: CB1R antagonist AM251, CB1R-shRNA intracerebroventricular injection | 1. CB1R (cannabinoid receptor 1): In the PSD group, it decreased; in the electroacupuncture group, it increased; antagonists/knockdown could reverse the electroacupuncture effect. 2. Related to mitochondrial biogenesis: NRF1, TFAM (increased in the electroacupuncture group). Mitochondrial function-related: COX IV, AIF: increased in the electroacupuncture group. Cyto C: decreased in the electroacupuncture group. 3. Pathway relationship: Electroacupuncture activates CB1R, promoting mitochondrial biogenesis (↑NRF1/TFAM), improving mitochondrial function, anti-depressive-like behavior, and improving cognition. |
| 104 | The rat model of middle cerebral artery occlusion/reperfusion (MCAO/R) (simulating cognitive impairment after ischemic stroke) | Adult male Sprague-Dawley (SD) rats, with a body weight of 300 ± 20 grams. | Electroacupuncture (EA): Points: Shenting (DU24), Baihui (DU20). Parameters: 4/20Hz sparse-dense wave, 0.5mA, 2V, 30 minutes each time, once a day, for 7 consecutive days. Intervention timing: Begins 24 hours after MCAO/R surgery. Drug intervention: Lumirindole, a melanopsin receptor antagonist, is injected intraperitoneally (30mg/kg/d). | Infarction: T2WI magnetic resonance imaging (infarction volume) Cognitive function: Morris water maze (escape latency, number of crossing platforms) Melatonin level: ELISA (serum), AANAT (mRNA and protein) Autophagy/mitochondrial autophagy: Western blot (LC3-II/I, PINK1, Parkin), electron microscopy (mitochondrial ultrastructure) Oxidative stress: ROS level Inflammasome: Western blot (NLRP3, ASC, caspase-1, IL-1β, IL-18) Microglia: Immunofluorescence (Iba-1) | 1. Melatonin pathway: AANAT (synthesis-limiting enzyme), serum melatonin (increased by electroacupuncture) 2. Mitochondrial autophagy: PINK1, Parkin, LC3-II/I (increased by electroacupuncture) 3. Oxidative stress: ROS (reduced by electroacupuncture) NLRP3 inflammasome: NLRP3, ASC, caspase-1, IL-1β, IL-18 (reduced by electroacupuncture) 4. Microglia: Iba-1 positive cells (reduced by electroacupuncture) 5. Pathway relationship: Electroacupuncture upregulates AANAT/melatonin, enhances PINK1/Parkin-mediated mitochondrial autophagy, removes damaged mitochondria, reduces ROS, inhibits NLRP3 inflammasome activation, alleviates neuroinflammation, and improves cognition. |
| 107 | The rat model of middle cerebral artery occlusion/reperfusion (MCAO/R) (simulating cognitive impairment after ischemic stroke) | Adult male Sprague-Dawley (SD) rats, aged 6-8 weeks, with a body weight of 230-280 grams. | Electroacupuncture (EA): Acupoints: Shenting (GV24), Baihui (GV20). Parameters: 1–20Hz sparse-dense waves, 1–3mA, 30 minutes each time, once a day, for 14 consecutive days. Intervention timing: Begins 24 hours after MCAO/R surgery. Positive control drug: Donepezil (DNP, 0.92mg/kg/d intragastric administration). | Neurological function: Zea-Longa score Cognitive function: Novel Object Recognition (NOR) Cerebral infarction: TTC staining Neuronal pathology: HE staining (CA1 region of hippocampus) Glucose metabolism: Glucose content (hippocampus) Molecular detection: RT-qPCR, Western blot, IHC (IRS-1, PI3K, p-PI3K, AKT, p-AKT, GLUT1, GLUT3) | 1. Insulin signaling pathway: IRS-1: Increased in the MCAO/R group, decreased in the electroacupuncture group p-PI3K / PI3K, p-AKT / AKT: Decreased in the MCAO/R group, increased in the electroacupuncture group 2. Glucose transporters: GLUT1, GLUT3: Decreased in the MCAO/R group, increased in the electroacupuncture group 3. Pathway relationship: Electroacupuncture activates the IRS/PI3K/AKT pathway, upregulates GLUT1/GLUT3, improves cerebral glucose metabolism, alleviates hippocampal neuron damage, and improves cognition |
| 108 | Rat model of middle cerebral artery occlusion (simulating ischemic stroke) | Adult male Sprague-Dawley (SD) rats, 3 months old, with a body weight of 260 ± 20 grams. | Electroacupuncture (EA): Acupoints: Baihui (DU20), Shenting (DU24). Parameters: 1–20Hz sparse-dense waves, 30 minutes each time, once a day, for 7 consecutive days. Intervention timing: Start 24 hours after MCAO. Control: Non-acupoint/non-acupuncture (NA) electroacupuncture. | Neurological function: Zea-Longa score Cognitive function: Morris water maze (escape latency, number of platform crossings) Cerebral infarction: MRI (infarction volume) Cerebral edema: Brain water content Glucose metabolism: PET/CT (glucose uptake), ATP, lactate (LA), lactate dehydrogenase (LDH) Molecular detection: Western blot (GLUT1, GLUT3) | 1. Glucose transporters: GLUT1, GLUT3: Decreased in the MCAO group, increased in the electroacupuncture group 2. Energy metabolism related: ATP: Increased in the electroacupuncture group Lactic acid (LA), Lactate dehydrogenase (LDH): Decreased in the electroacupuncture group |
| 113 | The rat model of middle cerebral artery occlusion/reperfusion (MCAO/R) (simulating ischemic stroke) | Adult male Sprague-Dawley (SD) rats, aged 10-12 weeks, with a body weight of 260 ± 20 grams. | Electroacupuncture (EA): Acupoints: Shenting (GV24), Baihui (GV20). Parameters: 1–20Hz sparse-dense waves, 2mA, 6V, 30 minutes each time, once a day, for 8 consecutive days. Intervention timing: Begins 2 hours after MCAO/R surgery. | Neurological function: Zea-Longa score Cerebral infarction: TTC staining (infarction volume) Cell ultrastructure: Transmission electron microscopy (autophagosomes, mitochondrial morphology) Cognitive function: Morris water maze (escape latency, number of crossing platforms) Molecular detection: RT-qPCR and Western blot (PI3K, Akt, p-Akt, mTOR, Beclin-1, p53) | 1. PI3K/Akt signaling pathway: PI3K, p-Akt, mTOR, Beclin-1: Expression increased after electroacupuncture p53: Expression decreased after electroacupuncture 2. Autophagy and apoptosis: Autophagy enhanced and apoptosis reduced after electroacupuncture |
| 114 | Rat model of middle cerebral artery occlusion (simulating focal cerebral ischemia) | Adult male Sprague-Dawley (SD) rats, with a body weight of 250 ± 20 grams. | Electroacupuncture (EA): Points: bilateral Fengchi (GB20), Fengfu (GV16), Dazhui (GV14). Parameters: 20Hz continuous wave, 1mA, 30 minutes each time, once a day, for 14 consecutive days. Intervention timing: Start 10 days after MCAO surgery. | General condition: Body weight, Zea-Longa neurological function score Cognitive function: Morris water maze (escape latency, search distance, number of platform crossings, target quadrant stay time) Cerebral infarction: TTC staining Pathology and apoptosis: HE staining, TUNEL staining, Western blot (Bax, Bcl-2, caspase-1, cleaved caspase-3) Inflammation: ELISA (IL-1β, IL-18), RT-qPCR and Western blot (NLRP3) Autophagy: RT-qPCR and Western blot (mTOR, Beclin-1, LC3 II/I, p62), transmission electron microscopy (autophagosomes) | 1.Autophagy-related: LC3 II/I, autophagosomes: Decreased after electroacupuncture p62, mTOR, Beclin-1: Increased after electroacupuncture 2.Inflammation-related: NLRP3, IL-1β, IL-18: Decreased after electroacupuncture Apoptosis-related: Bax, caspase-1, cleaved caspase-3: Decreased after electroacupuncture Bcl-2: Increased after electroacupuncture |
